# Supplementary material
Source: Springer Nature journal article supplement (http://www.springermedizin.de/resource/supplementary/12991_2013_1361_MOESM2_ESM.pdf/9613802)

a

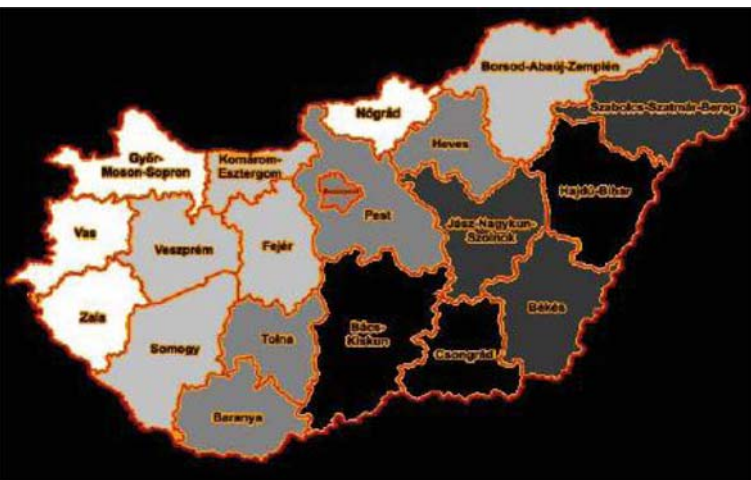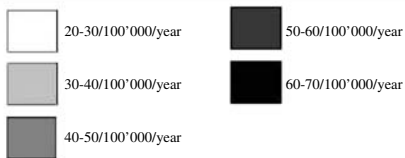

b

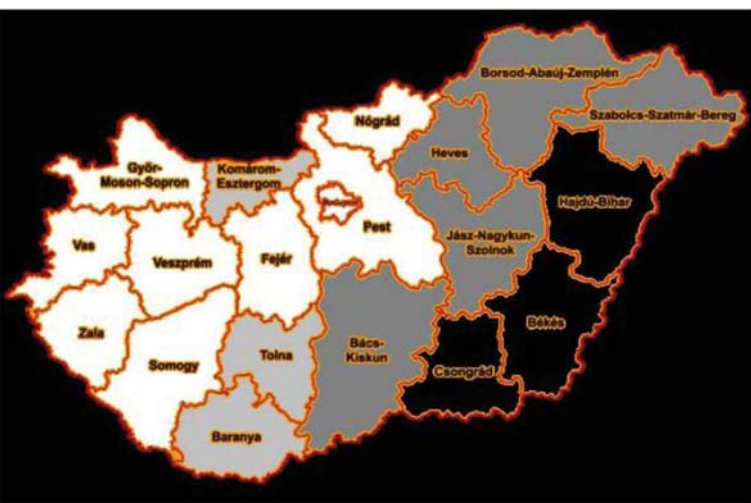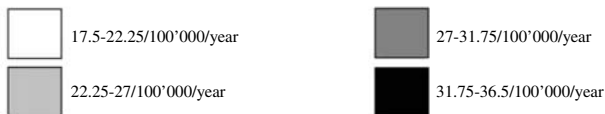

Source: Hungarian Central Statistical Office, Budapest, Hungary.

Supplement: MOESM2 [file 9613802]
